# Supplementary material for: Donor–acceptor duality of the transition-metal-like B2 core in core–shell-like metallo-borospherenes La3&[B2@B17]− and La3&[B2@B18]−
Source: Royal Society of Chemistry journal article supplement (doi:10.1039/d0ra06769e), 2020-01-01
Supplement: d0ra06769e1.pdf [file d0ra06769e1.pdf]

## Supporting Information

### Donor-Acceptor Duality of The Transition-Metal-Like B<sub>2</sub> Core in Core-Shell-Like Metallo-Borosphenes La<sub>3</sub>&[B<sub>2</sub>@B<sub>17</sub>]<sup>-</sup> and La<sub>3</sub>&[B<sub>2</sub>@B<sub>18</sub>]<sup>-</sup>

Xiao-Yun Zhao,<sup>a,b</sup> Miao Yan,<sup>a</sup> Zhihong Wei,<sup>\*a</sup> and Si-Dian Li<sup>\*a</sup>

<sup>a</sup> Key Laboratory of Materials for Energy Conversion and Storage of Shanxi Province, Institute of Molecular Science, Shanxi University, Taiyuan 030006, China.

<sup>b</sup> Department of Applied Chemistry, Yuncheng University, Yuncheng 044000, China.

E-mail: lisidian@sxu.edu.cn

### Contents

**Figure S1** Low-lying isomers of La<sub>3</sub>B<sub>20</sub><sup>-</sup> at PBE0, TPSSh and CCSD(T) levels.

**Figure S2** Low-lying isomers of La<sub>3</sub>B<sub>19</sub><sup>-</sup> at PBE0, TPSSh and CCSD(T) levels.

**Figure S3** Born-Oppenheimer molecular dynamics simulations of C<sub>2v</sub> La<sub>3</sub>&[B<sub>2</sub>@B<sub>17</sub>]<sup>-</sup> at 300K, 700K and 1000K.

**Figure S4** Born-Oppenheimer molecular dynamics simulations of D<sub>3h</sub> La<sub>3</sub>&[B<sub>2</sub>@B<sub>18</sub>]<sup>-</sup> at 300K, 700K and 1000K.

**Figure S5** Shape of the deformation densities Δρ of D<sub>3h</sub> La<sub>3</sub>&[B<sub>2</sub>@B<sub>18</sub>]<sup>-</sup> (**3**).

**Figure S6** AdNDP bonding patterns of C<sub>2v</sub> La<sub>3</sub>&[B<sub>2</sub>@B<sub>17</sub>]<sup>2-</sup>.

**Figure S7** Calculated iso-chemical shielding surfaces (ICSSs) of La<sub>3</sub>&B<sub>19</sub><sup>-</sup> and La<sub>3</sub>&B<sub>20</sub><sup>-</sup>.

**Figure S8** Simulated IR, Raman and photoelectron spectra of C<sub>2v</sub> La<sub>3</sub>&[B<sub>2</sub>@B<sub>17</sub>]<sup>-</sup> (**2**).

**Figure S9** Simulated (a) IR and (b) Raman spectra of D<sub>3h</sub> La<sub>3</sub>&B<sub>18</sub><sup>-</sup> (**1**).

**Table S1** Calculated natural atomic charges, electronic configurations and Wiberg bond orders in C<sub>2v</sub> La<sub>3</sub>&[B<sub>2</sub>@B<sub>17</sub>]<sup>-</sup> (**2**) and D<sub>3h</sub> La<sub>3</sub>&[B<sub>2</sub>@B<sub>18</sub>]<sup>-</sup> (**3**).

**Table S2** EDA-NOCV calculations using different fragments as well as different electron configurations at PBE0/TZP-ZORA level. All energy values are in kcal mol<sup>-1</sup>.

**Table S3** The compositions from the B<sub>2</sub> [<sup>1</sup>Σ<sub>g</sub><sup>+</sup>] and B<sub>18</sub>La<sub>3</sub><sup>-</sup> [<sup>1</sup>A<sub>1</sub>] fragments to the 29e', 15e'', 22a<sub>1</sub>' and 13a<sub>2</sub>'' MOs of D<sub>3h</sub> La<sub>3</sub>&[B<sub>2</sub>@B<sub>18</sub>]<sup>-</sup> (**3**).

**Table S4** Optimized coordinates of C<sub>2v</sub> La<sub>3</sub>&[B<sub>2</sub>@B<sub>17</sub>]<sup>-</sup> (**2**) at PBE0.

**Table S5** Optimized coordinates of D<sub>3h</sub> La<sub>3</sub>&[B<sub>2</sub>@B<sub>18</sub>]<sup>-</sup> (**3**) at PBE0.

**Table S6** Optimized coordinates of D<sub>3h</sub> La<sub>3</sub>B<sub>18</sub><sup>-</sup> (**1**) at PBE0.

**Fig. S1** Low-lying isomers of  $\text{La}_3\text{B}_{20}^-$  with their relative energies (with zero-point corrections included) indicated in eV at PBE0/B/6-311+G\*/La/ECP28MWB, TPSSH/B/6-311+G\*/La/ECP28MWB (in brackets) and CCSD(T)/B/6-31G\*/La/ECP28MWB //PBE0/B/6-311+G\*/La/ECP28MWB (in square brackets) levels. The  $\text{B}_n$  cores are highlighted in red.

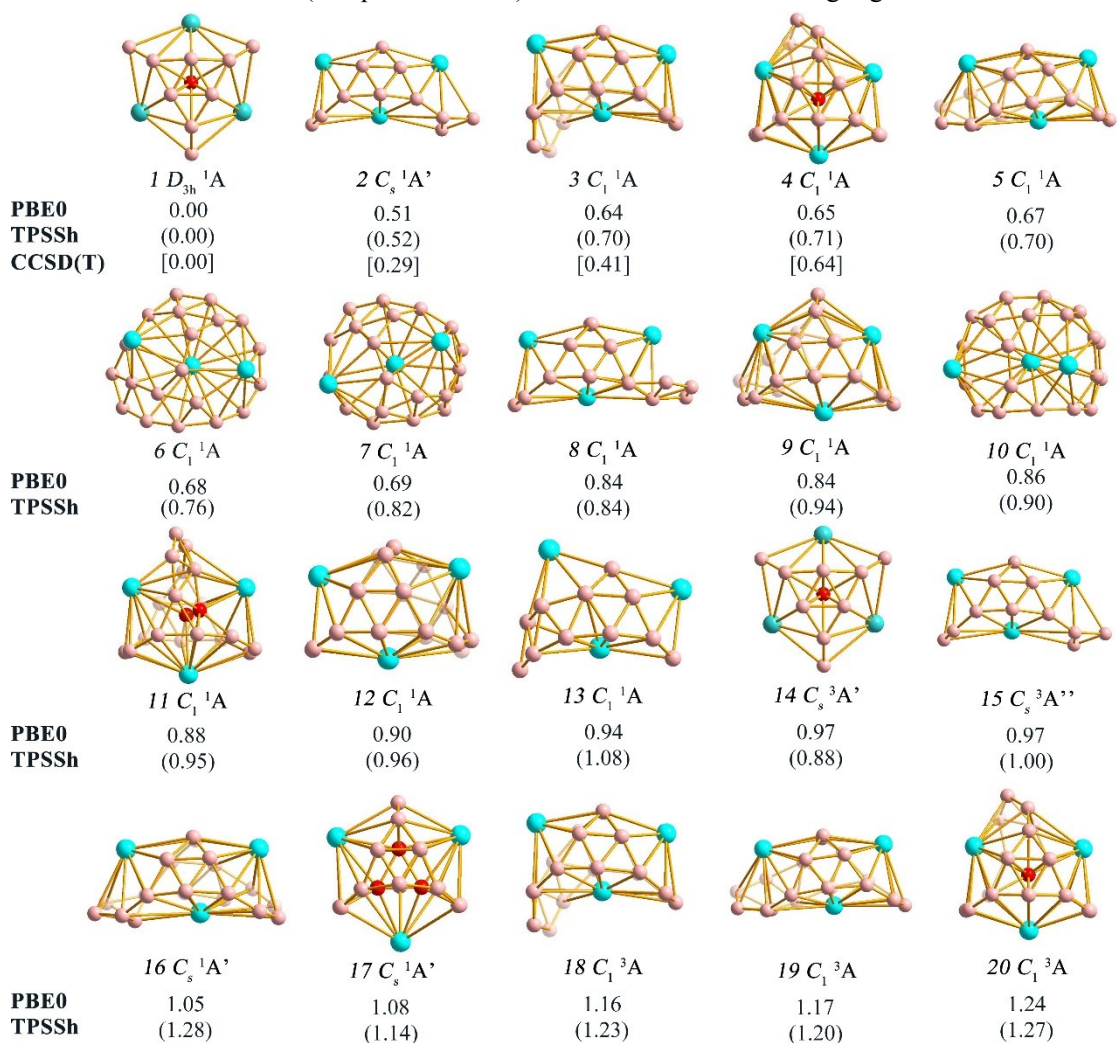

**Fig. S2** Low-lying isomers of  $\text{La}_3\text{B}_{19}^-$  with their relative energies (with zero-point corrections included) indicated in eV at PBE0/B/6-311+G\*/La/ECP28MWB, TPSSh/B/6-311+G\*/La/ECP28MWB (in brackets) and CCSD(T)/B/6-31G\*/La/ECP28MWB //PBE0/B/6-311+G\*/La/ECP28MWB (in square brackets) levels. The  $\text{B}_n$  cores are highlighted in red.

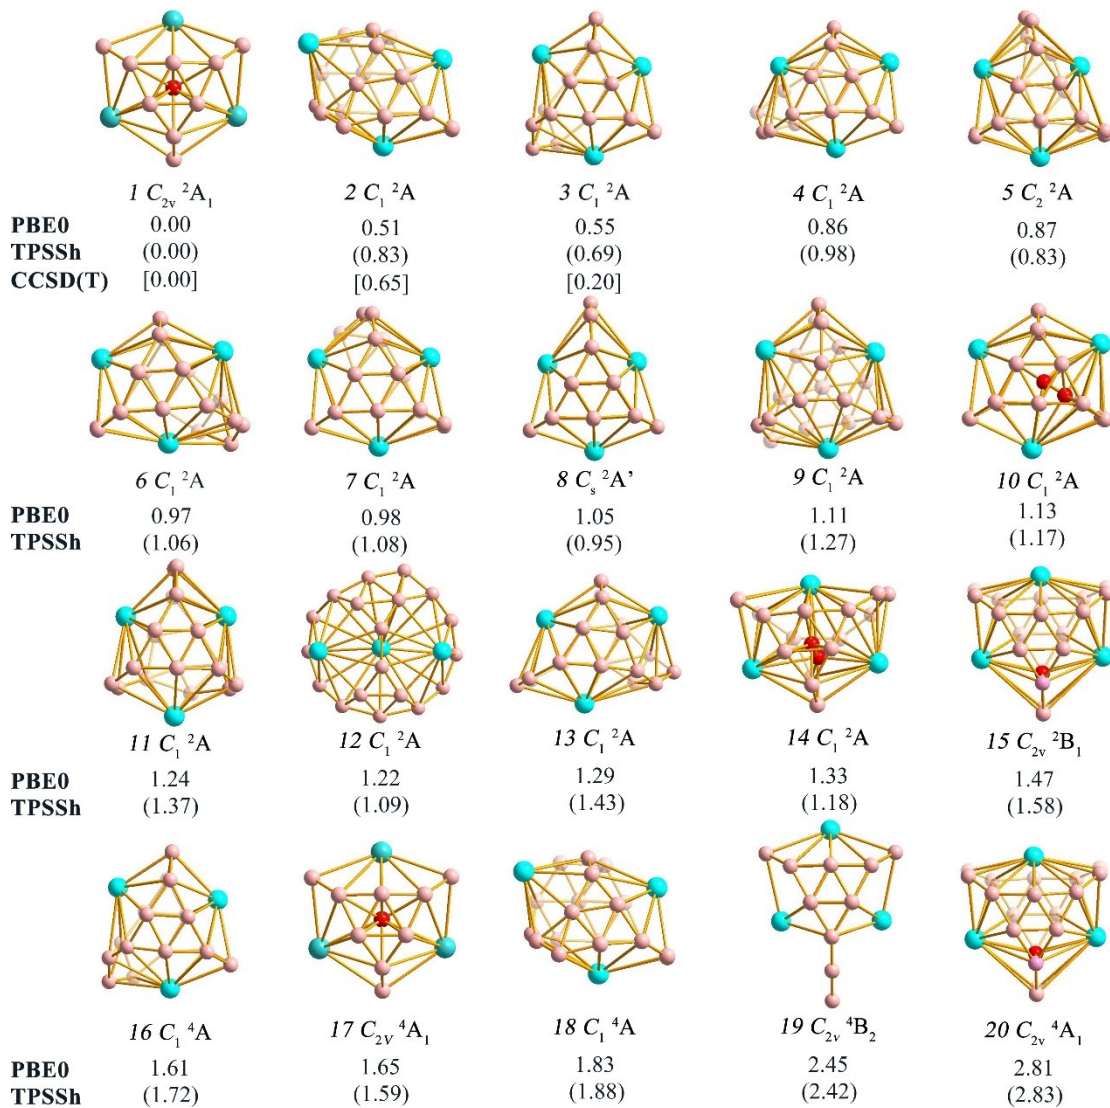

**Fig. S3** Born-Oppenheimer molecular dynamics simulations of  $C_{2v} La_3[B_2@B_{17}]^-$  at 300K, 700K and 1000K, with the calculated average root-mean-square-deviations (RMSD) and maximum bond length deviations (MAXD) indicated in Å.

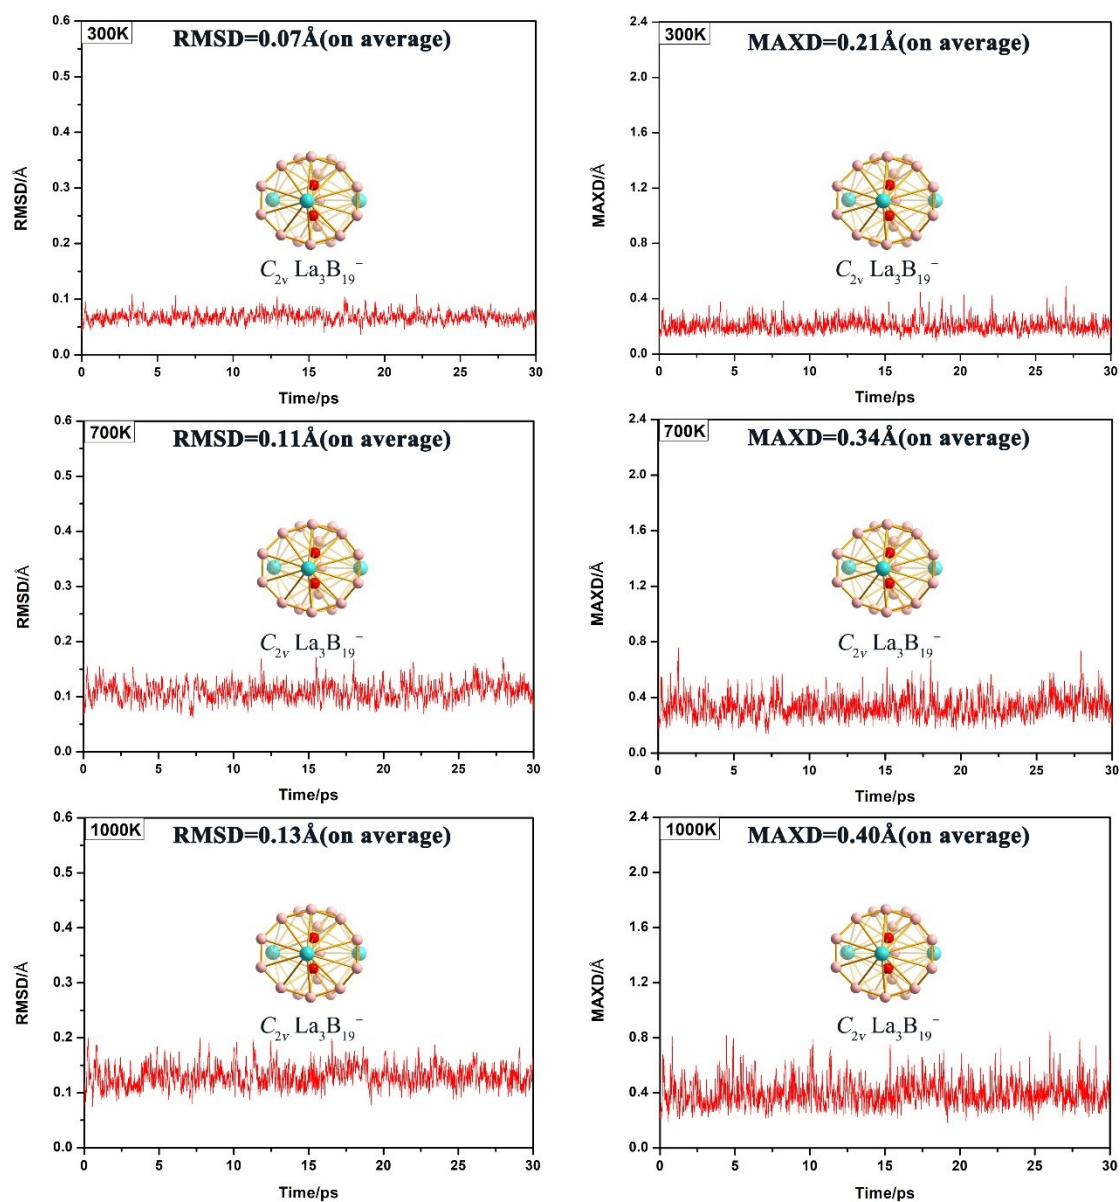

**Fig. S4** Born-Oppenheimer molecular dynamics simulations of  $D_{3h}$   $\text{La}_3\text{B}_{20}^-$  (**3**) at 300K, 700K and 1000K, with the calculated average root-mean-square-deviations (RMSD) and maximum bond length deviations (MAXD) indicated in Å.

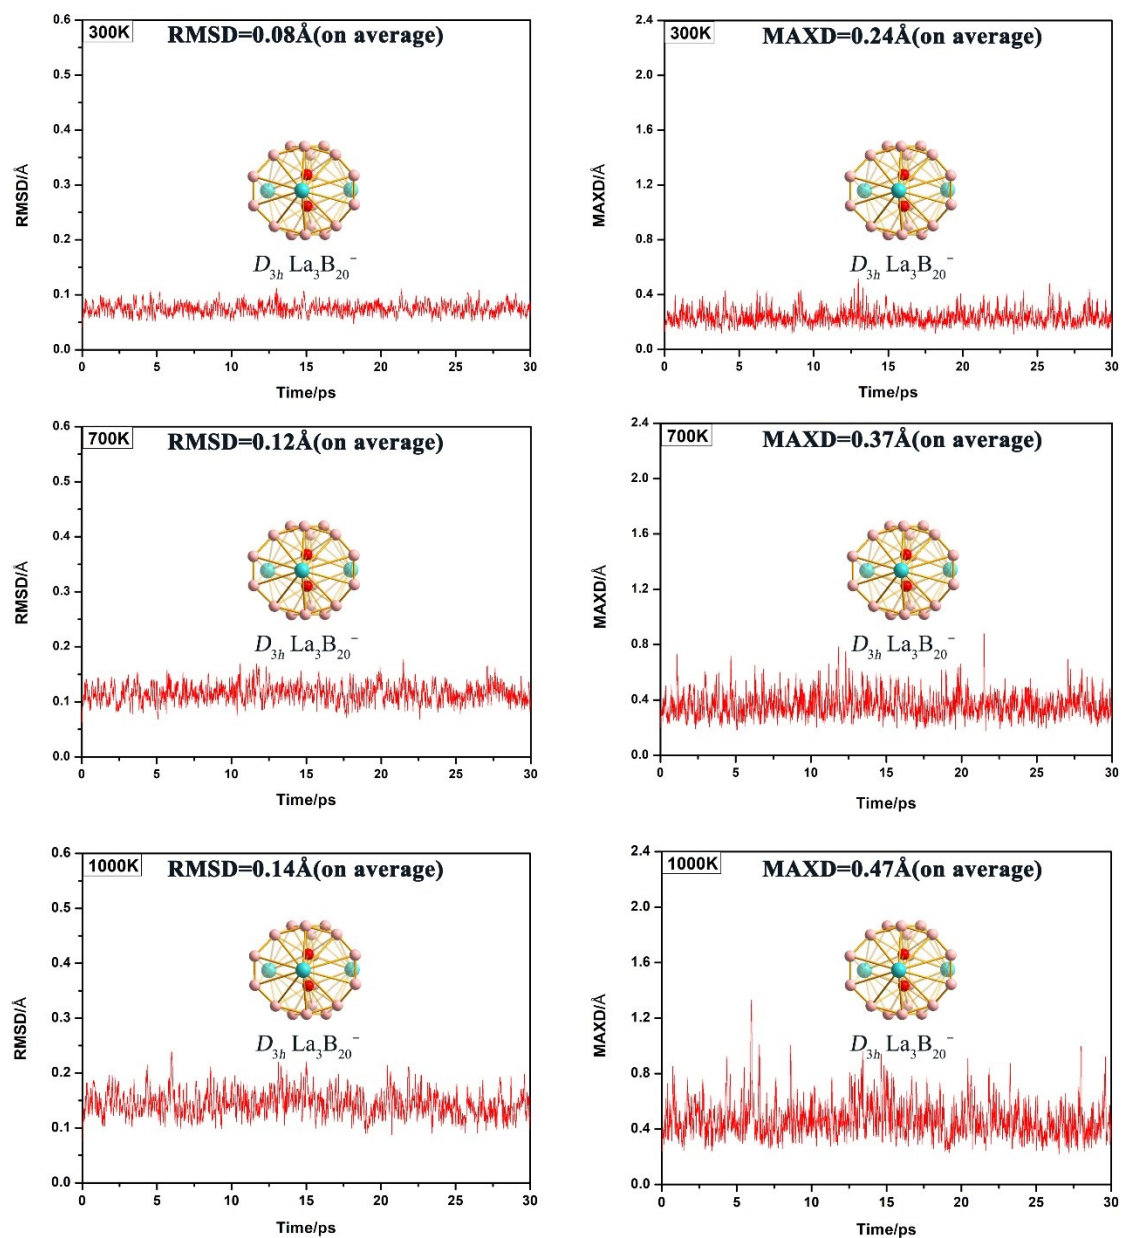

**Fig. S5.** Shape of the deformation densities  $\Delta\rho_{(1)-(4)}$  (isovalue = 0.0025 a.u.) and eigenvalues  $\nu$ , which are associated with the orbital interactions  $\Delta E_{\text{orb}(1)-(4)}$  in  $\text{B}_{20}\text{La}_3^-$ . The color code of the charge flow is red  $\rightarrow$  blue.

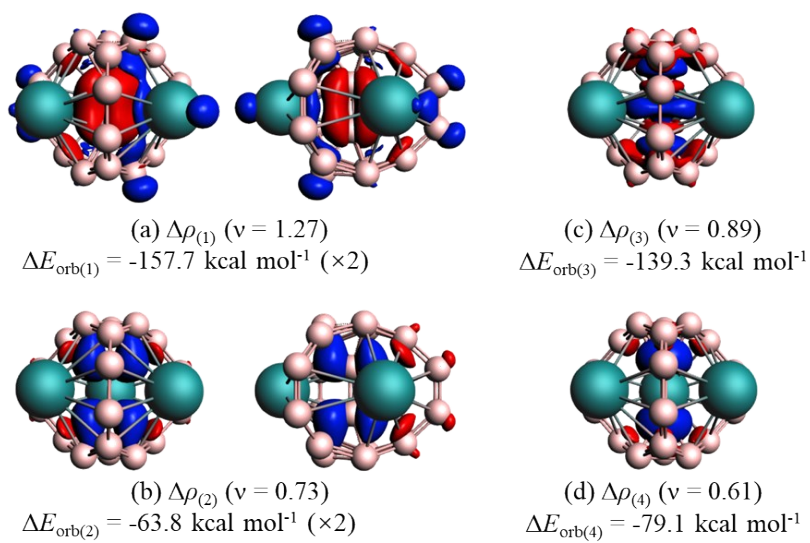

**Fig. S6** AdNDP bonding patterns of  $C_{2v}$   $\text{La}_3\text{[B}_2\text{@B}_{17}]^{2-}$ , with the occupation numbers (ON) indicated.

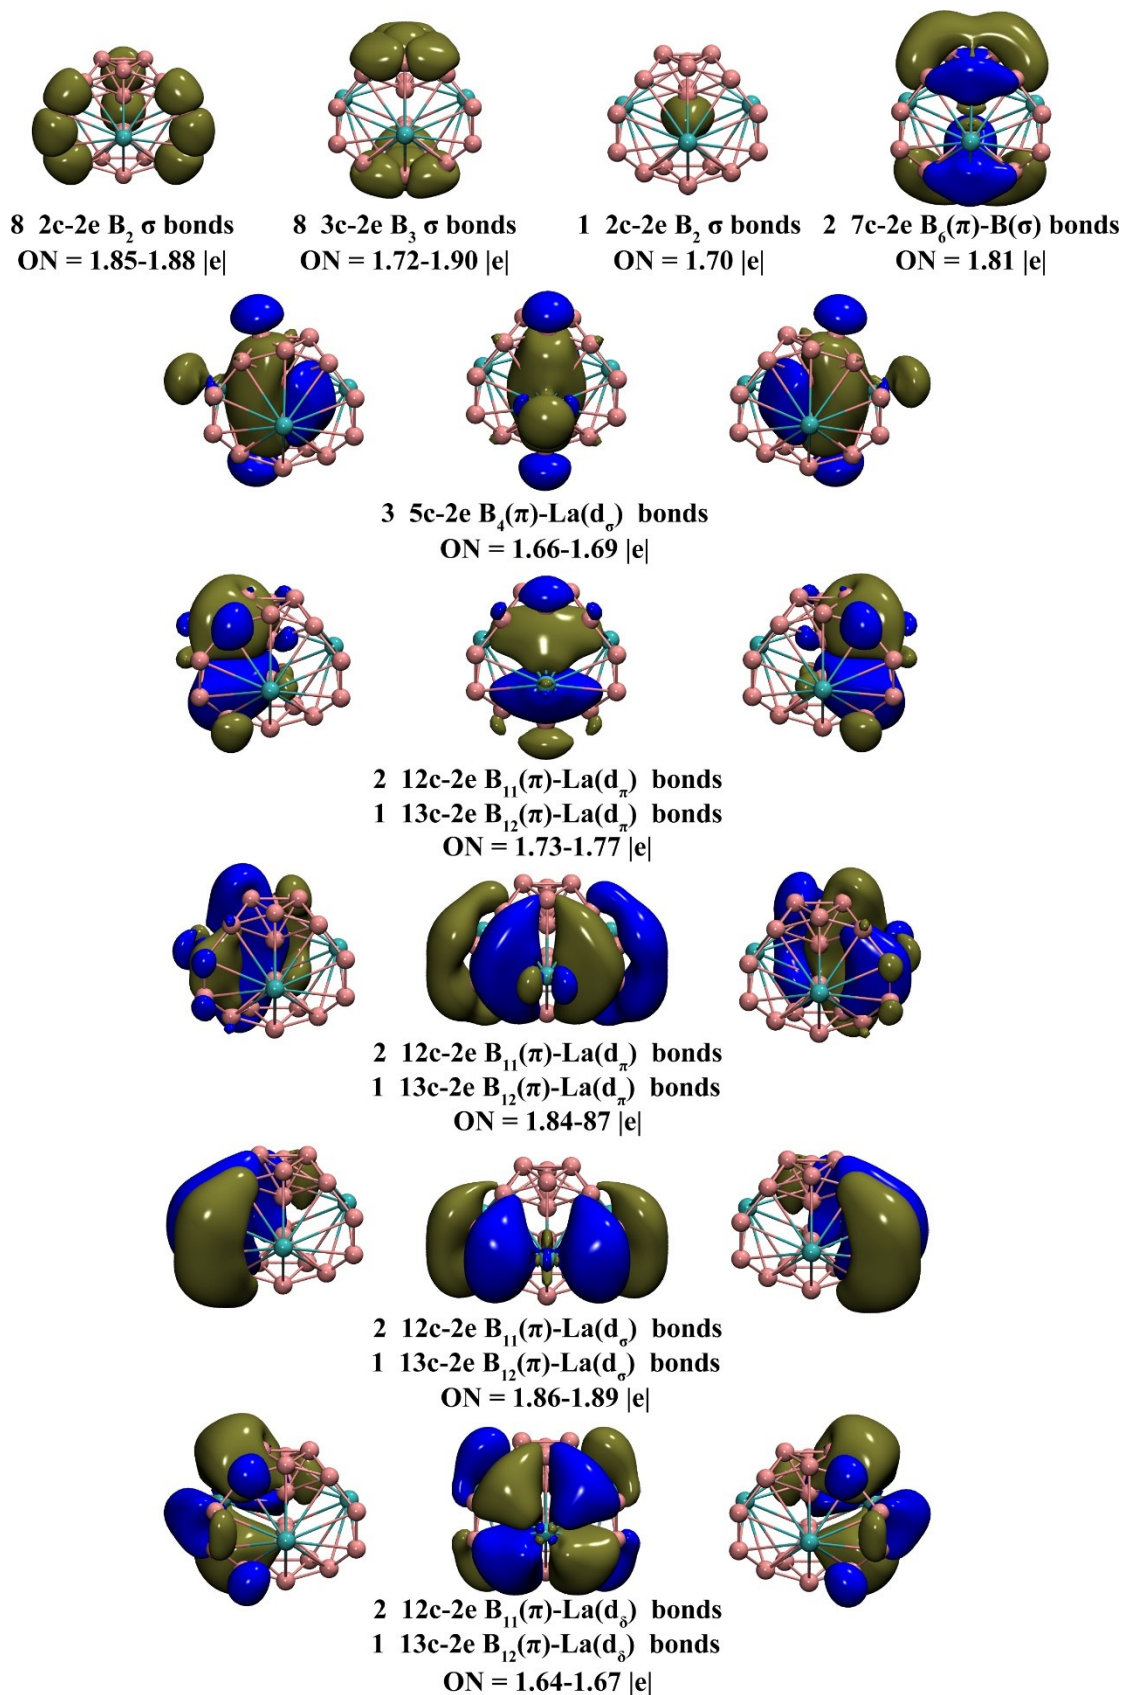

**Fig. S7** Comparison of the calculated iso-chemical shielding surfaces (ICSSs) of (a)  $C_{2v}$   $\text{La}_3\&[\text{B}_2@\text{B}_{17}]^-$  (**2**), (b)  $D_{3h}$   $\text{La}_3\&[\text{B}_2@\text{B}_{18}]^-$  (**3**), and (c)  $D_{6h}$   $\text{C}_6\text{H}_2$ , with the corresponding NICS-ZZ components indicated. The  $C_2$  axis of  $\text{La}_3\&\text{B}_{19}^-$  and  $\text{La}_3\&\text{B}_{20}^-$  are designated as z axis in vertical direction. Yellow regions stand for chemical shielding areas, while green areas represent chemical de-shielding areas.

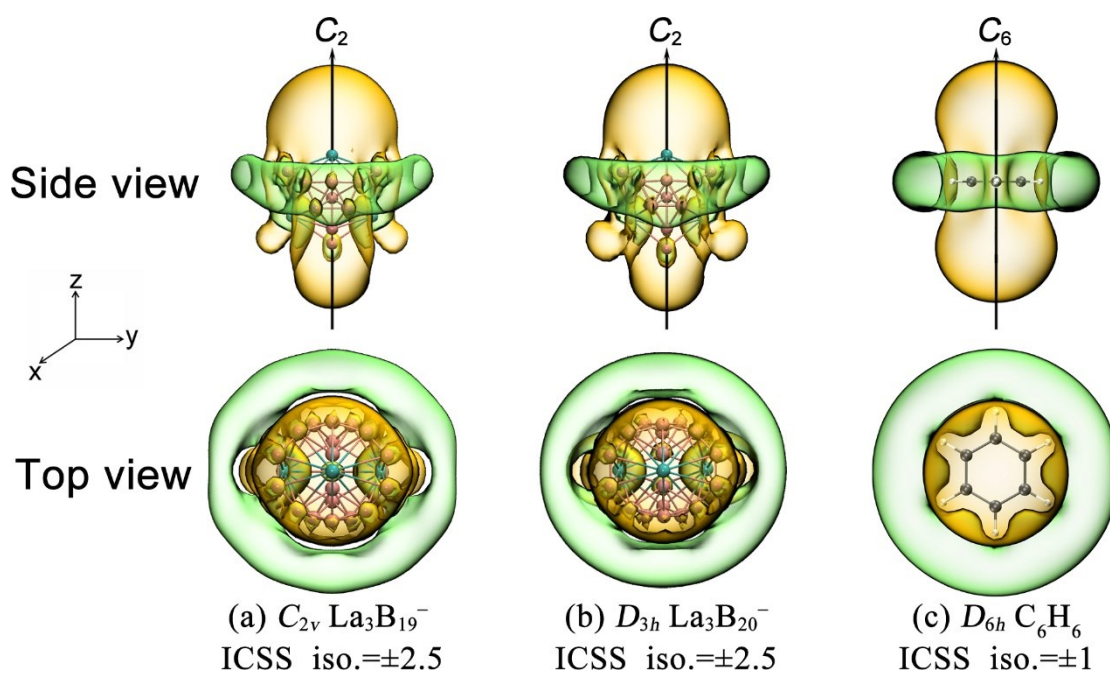



**Fig. S8** Simulated (a) IR, (b) Raman and (c) photoelectron spectrum of  $C_{2v}$   $La_3[B_2@B_{17}]^-$  (**2**) at PBE0/B/6-311+G\*/La/ECP28MWB level.

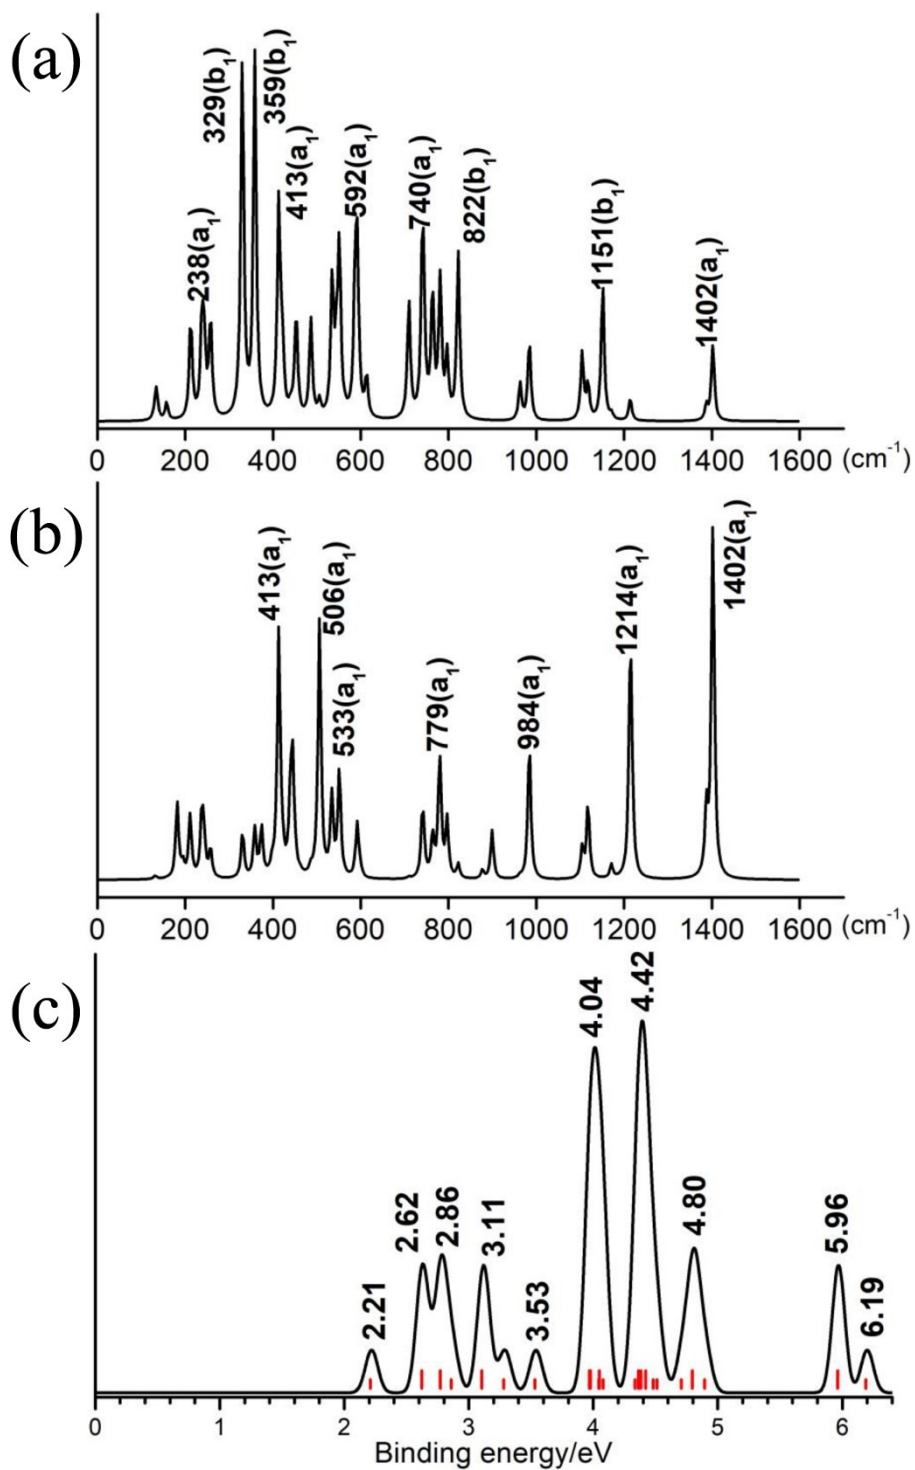

**Fig. S9** Simulated (a) IR and (b) Raman spectrum of  $D_{3h}$   $La_3B_{18}^-$  at PBE0/B/6-311+G\*/La/ECP28MWB level.

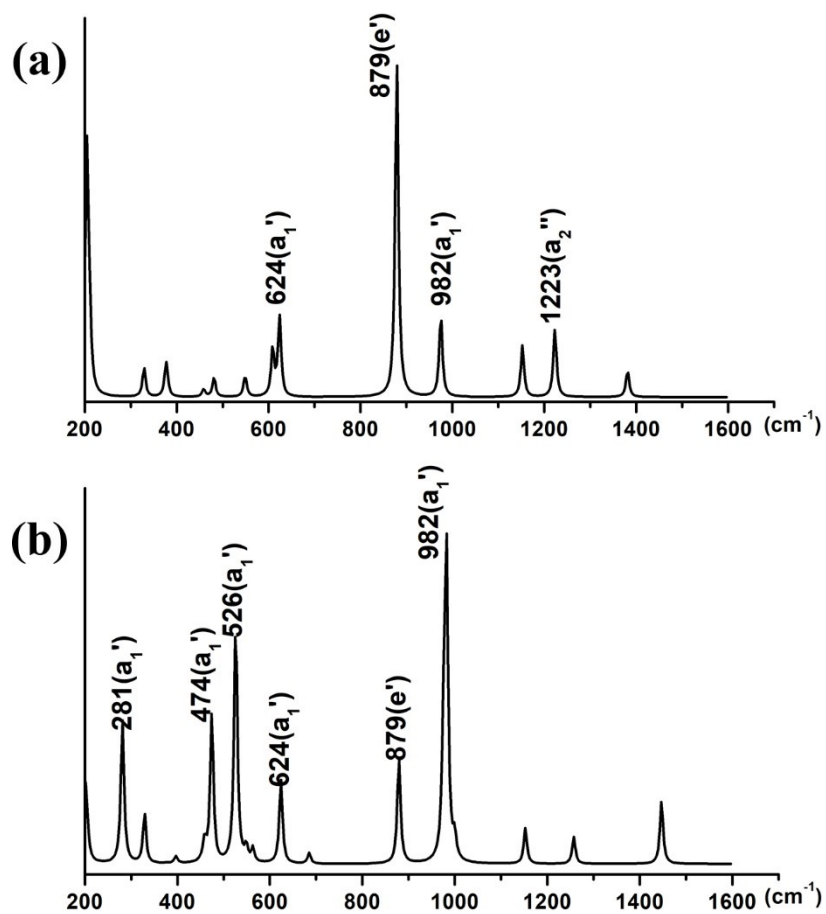

**Table S1.** Calculated natural atomic charges, electronic configurations, and Wiberg bond orders of the concerned atoms or structural units in  $C_{2v}$   $La_3@[B_2@B_{17}]^-$  (**2**) and  $D_{3h}$   $La_3@[B_2@B_{18}]^-$  (**3**).

| Natural Charge                               |      |                   |                |                   | Electron Configuration                    |                                          |
|----------------------------------------------|------|-------------------|----------------|-------------------|-------------------------------------------|------------------------------------------|
|                                              | La   | B <sub>core</sub> | B <sub>6</sub> | B <sub>edge</sub> | La                                        | B <sub>core</sub>                        |
| B <sub>19</sub> La <sub>3</sub> <sup>-</sup> | 1.20 | -0.10             | -0.21 - -0.25  | -0.33             | [Xe]6s <sup>0.11</sup> 5d <sup>1.53</sup> | [H]2s <sup>0.47</sup> 2p <sup>2.58</sup> |
|                                              | 1.29 |                   |                | -0.14             | [Xe]6s <sup>0.12</sup> 5d <sup>1.43</sup> |                                          |
| B <sub>20</sub> La <sub>3</sub> <sup>-</sup> | 1.28 | -0.13             | -0.23 - -0.25  | -0.29             | [Xe]6s <sup>0.12</sup> 5d <sup>1.46</sup> | [H]2s <sup>0.48</sup> 2p <sup>2.60</sup> |

  

| Wiberg bond index                            |                     |                    |                                      |                      |                      |                                   |
|----------------------------------------------|---------------------|--------------------|--------------------------------------|----------------------|----------------------|-----------------------------------|
|                                              | La <sub>total</sub> | B <sub>total</sub> | B <sub>core</sub> -B <sub>core</sub> | La-B <sub>core</sub> | La-B <sub>ring</sub> | B <sub>core</sub> -B <sub>6</sub> |
| B <sub>19</sub> La <sub>3</sub> <sup>-</sup> | 3.15                | 3.60               | 0.73                                 | 0.27                 | 0.17-0.26            | 0.27-0.42                         |
|                                              | 3.22                | 3.82               |                                      |                      |                      |                                   |
| B <sub>20</sub> La <sub>3</sub> <sup>-</sup> | 3.11                | 3.71<br>3.85       | 0.73                                 | 0.26                 | 0.16-0.29            | 0.27-0.43                         |

**Table S2.** EDA-NOCV calculations using using different fragments as well as different electron configurations at PBE0/TZP-ZORA level for  $D_{3h}$   $\text{La}_3\&[\text{B}_2@B_{18}]^-$  (**3**). All energy values are in kcal mol<sup>-1</sup>.

| Energy terms               | Interacting fragments        |                              |                            |                   |                 |
|----------------------------|------------------------------|------------------------------|----------------------------|-------------------|-----------------|
|                            | $\text{B}_2 [^1\Sigma_g^+]$  | $\text{B}_2 [^3\Sigma_g^-]$  | $\text{B}_2^-$             | $\text{B}_{20}^-$ | $\text{B}_{20}$ |
|                            | +                            | +                            | +                          | +                 | +               |
|                            | $\text{B}_{18}\text{La}_3^-$ | $\text{B}_{18}\text{La}_3^-$ | $\text{B}_{18}\text{La}_3$ | $\text{La}_3$     | $\text{La}_3^-$ |
| $\Delta E_{\text{int}}$    | -349.9                       | -276.78                      | -354.7                     | -645.46           | -701.72         |
| $\Delta E_{\text{Pauli}}$  | 1053.5                       | 1402.39                      | 1653.08                    | 2147.44           | 2270.48         |
| $\Delta E_{\text{elstat}}$ | -685.5                       | -699.47                      | -1107.07                   | -1297.06          | -1366.45        |
| $\Delta E_{\text{orb}}$    | -717.9                       | -979.7                       | -900.71                    | -1495.84          | -1605.75        |

**Table S3.** The compositions from the  $\text{B}_2 [^1\Sigma_g^+]$  and  $\text{B}_{18}\text{La}_3^- [^1A_1]$  fragments to the 29e', 15e'', 22a<sub>1</sub>' and 13a<sub>2</sub>'' MOs of  $D_{3h}$   $\text{La}_3\&[\text{B}_2@B_{18}]^-$  (**3**).

| MOs                 | Compositions                                                                                                                                               |
|---------------------|------------------------------------------------------------------------------------------------------------------------------------------------------------|
| 29e'                | 33% ( $\text{B}_{18}\text{La}_3^-$ 29e') + 26% ( $\text{B}_{18}\text{La}_3^-$ 27e') + 16% ( $\text{B}_2$ 1e')                                              |
| 15e''               | 76% ( $\text{B}_{18}\text{La}_3^-$ 15e'') + 15% ( $\text{B}_2$ 1e'')                                                                                       |
| 22a <sub>1</sub> '  | 32% ( $\text{B}_{18}\text{La}_3^-$ 20a <sub>1</sub> ') + 21% ( $\text{B}_{18}\text{La}_3^-$ 19a <sub>1</sub> ') + 25% ( $\text{B}_2$ 3a <sub>1</sub> ')    |
| 13a <sub>2</sub> '' | 70% ( $\text{B}_{18}\text{La}_3^-$ 12a <sub>2</sub> '') + 20% ( $\text{B}_{18}\text{La}_3^-$ 10a <sub>2</sub> '') + 25% ( $\text{B}_2$ 2a <sub>2</sub> '') |

**Table S4** Optimized coordinates of  $C_{2v}$   $La_3[B_2@B_{17}]^-$  (**2**) at PBE0.

|    |           |           |           |
|----|-----------|-----------|-----------|
| B  | 0.000000  | 0.816066  | -0.132664 |
| B  | 0.876134  | 2.201706  | -0.723996 |
| B  | 0.000000  | 2.331682  | 0.796152  |
| B  | -1.585405 | 1.845301  | 0.773170  |
| B  | -2.572700 | 0.754338  | 1.416424  |
| B  | 0.000000  | -2.331682 | 0.796152  |
| B  | -0.876134 | -2.201706 | -0.723996 |
| B  | 1.585405  | 1.845301  | 0.773170  |
| B  | 2.572700  | -0.754338 | 1.416424  |
| B  | 2.572700  | 0.754338  | 1.416424  |
| B  | 0.000000  | 0.000000  | -2.773172 |
| B  | 0.000000  | -0.816066 | -0.132664 |
| B  | 1.585405  | -1.845301 | 0.773170  |
| B  | 0.876134  | -2.201706 | -0.723996 |
| B  | 0.000000  | -1.400189 | -1.924255 |
| B  | 0.000000  | 1.400189  | -1.924255 |
| La | 0.000000  | 0.000000  | 2.337690  |
| La | 2.325484  | 0.000000  | -1.193743 |
| La | -2.325484 | 0.000000  | -1.193743 |
| B  | -1.585405 | -1.845301 | 0.773170  |
| B  | -0.876134 | 2.201706  | -0.723996 |
| B  | -2.572700 | -0.754338 | 1.416424  |

**Table S5** Optimized coordinates of  $D_{3h}$   $\text{La}_3\text{[B}_2\text{@B}_{18}]^-$  (**3**) at PBE0.

|    |           |           |           |
|----|-----------|-----------|-----------|
| B  | -0.867337 | -0.500757 | 2.276031  |
| B  | 0.867337  | -0.500757 | 2.276031  |
| B  | 1.608320  | 0.928564  | 1.832823  |
| B  | -1.608320 | 0.928564  | 1.832823  |
| B  | -2.613217 | 1.508742  | 0.754202  |
| B  | 0.000000  | 1.001515  | -2.276031 |
| B  | -0.867337 | -0.500757 | -2.276031 |
| B  | 0.000000  | 1.001515  | 2.276031  |
| B  | 2.613217  | 1.508742  | -0.754202 |
| B  | 2.613217  | 1.508742  | 0.754202  |
| B  | 0.000000  | -3.017483 | -0.754202 |
| B  | -1.608320 | 0.928564  | -1.832823 |
| B  | 1.608320  | 0.928564  | -1.832823 |
| B  | 0.867337  | -0.500757 | -2.276031 |
| B  | 0.000000  | -1.857128 | -1.832823 |
| B  | 0.000000  | -1.857128 | 1.832823  |
| La | 0.000000  | 2.499282  | 0.000000  |
| La | 2.164442  | -1.249641 | 0.000000  |
| La | -2.164442 | -1.249641 | 0.000000  |
| B  | -2.613217 | 1.508742  | -0.754202 |
| B  | 0.000000  | -3.017483 | 0.754202  |
| B  | 0.000000  | 0.000000  | 0.817146  |
| B  | 0.000000  | 0.000000  | -0.817146 |

**Table S6** Optimized coordinates of  $D_{3h}$   $\text{La}_3\text{B}_{18}^-$  (**1**) at PBE0.

|    |           |           |           |
|----|-----------|-----------|-----------|
| B  | 0.000000  | 0.956419  | 2.303950  |
| B  | 0.828283  | -0.478210 | 2.303950  |
| B  | 0.000000  | -1.877631 | 1.915718  |
| B  | -1.626076 | 0.938815  | 1.915718  |
| B  | -2.537306 | 1.464914  | 0.766682  |
| B  | -0.828283 | -0.478210 | -2.303950 |
| B  | 0.000000  | 0.956419  | -2.303950 |
| B  | -0.828283 | -0.478210 | 2.303950  |
| B  | 0.000000  | -2.929828 | -0.766682 |
| B  | 0.000000  | -2.929828 | 0.766682  |
| B  | 2.537306  | 1.464914  | -0.766682 |
| B  | -1.626076 | 0.938815  | -1.915718 |
| B  | 0.000000  | -1.877631 | -1.915718 |
| B  | 0.828283  | -0.478210 | -2.303950 |
| B  | 1.626076  | 0.938815  | -1.915718 |
| B  | 1.626076  | 0.938815  | 1.915718  |
| La | -2.006402 | -1.158397 | 0.000000  |
| La | 2.006402  | -1.158397 | 0.000000  |
| La | 0.000000  | 2.316794  | 0.000000  |
| B  | -2.537306 | 1.464914  | -0.766682 |
| B  | 2.537306  | 1.464914  | 0.766682  |
